# Supplementary material
Source: publisher figshare collection journal article supplement (https://gsajournals.figshare.com/articles/dataset/_/12252719)
Supplement: Supplementary file 1 [file 1]

## Sheet: Sheet1
Variant ID	Minor Allele	Major Allele	Reference Allele	Minor Allele Frequency	Minor Allele Count	Major Allele Count	Female Effect	Female P-value	Male Effect	Male P-value	Average Effect	Average P-value	Difference Effect (Female - Male)	Difference P-value	Gene 1 FlyBase ID	Gene 1 Symbol	Gene 1 Site Class	Gene 2 FlyBase ID	Gene 2 Symbol	Gene 2 Site Class	Gene 3 FlyBase ID	Gene 3 Symbol	Gene 3 Site Class	Gene 4 FlyBase ID	Gene 4 Symbol	Gene 4 Site Class
2L_13371600_SNP	G	C	C	0.1244	24	169	-8.63	2.17144e-05	-6.761	0.000368021	-7.695	6.9105e-06	-1.869	0.235324	FBgn0032512	CG9305	NON_SYNONYMOUS_CODING	FBgn0032511	CG9306	517 bp UPSTREAM
2L_13903135_SNP	C	T	C	0.3135	58	127	-3.195	0.0502527	1.89	0.176141	-0.6523	0.608765	-5.085	5.3231e-06	FBgn0019890	Smg5	SYNONYMOUS_CODING
2L_14657469_SNP	C	T	T	0.3602	67	119	0.5646	0.691108	-4.228	0.00151701	-1.832	0.134857	4.793	8.75515e-06	FBgn0003016	osp	INTRON
2L_14657527_SNP	A	G	G	0.478	87	95	0.9233	0.444431	-3.93	0.00244126	-1.503	0.206991	4.853	3.422e-06	FBgn0003016	osp	INTRON
2L_16766513_SNP	T	C	C	0.07576	15	183	-11.21	7.16173e-06	-7.393	0.00161614	-9.302	1.03195e-05	-3.818	0.0482752	FBgn0264695	Mhc	221 bp UPSTREAM
2L_17187208_SNP	A	G	A	0.05699	11	182	-12.66	3.38324e-06	-6.509	0.0169127	-9.584	9.20112e-05	-6.15	0.00569196	Intergenic
2L_17375311_SNP	A	T	T	0.2663	49	135	2.215	0.0936895	-3.038	0.0382926	-0.4115	0.759044	5.252	8.09393e-06	FBgn0032633	Lrch	INTRON
2L_3644145_SNP	C	A	A	0.267	51	140	-6.996	8.6615e-07	-4.531	0.00150498	-5.763	7.07764e-06	-2.465	0.036155	FBgn0000721	for	INTRON
2L_3677044_SNP	A	G	G	0.06091	12	185	-9.956	0.000111617	-0.5766	0.826658	-5.266	0.0270185	-9.379	8.13039e-06	FBgn0085369	CG34340	INTRON
2L_4440511_SNP	G	A	A	0.09596	19	179	-6.628	0.00338984	1.069	0.616172	-2.78	0.151038	-7.696	6.09323e-06	FBgn0031602	CG15431	INTRON	FBgn0259958	Sfp24F	918 bp DOWNSTREAM
2L_7299772_SNP	G	A	A	0.2391	44	140	-6.972	3.39205e-06	-3.431	0.023797	-5.201	0.000139384	-3.541	0.00421749	Intergenic
2L_9058000_SNP	G	C	C	0.3111	56	124	-3.877	0.00916695	-6.283	5.94447e-06	-5.08	6.30655e-05	2.406	0.037768	FBgn0051708	CG31708	INTRON
2L_9336007_SNP	C	T	C	0.1472	29	168	-7.678	9.98015e-05	-6.822	9.16979e-05	-7.25	4.21066e-06	-0.8559	0.556047	FBgn0026439	Eaat1	INTRON
2L_9431148_SNP	A	C	C	0.2487	47	142	-4.705	0.00197641	-6.519	6.9995e-06	-5.612	2.24441e-05	1.814	0.134905	FBgn0032117	FucTB	119 bpUPSTREAM	FBgn0011232	scat	257 bp UPSTREAM
2L_9433778_SNP	T	G	G	0.2888	54	133	-4.378	0.00242833	-6.238	7.32088e-06	-5.308	2.92929e-05	1.861	0.109695	FBgn0011232	scat	SYNONYMOUS_CODING
2R_10726603_SNP	A	T	T	0.09045	18	181	-11.3	9.13729e-08	-5.602	0.00970669	-8.453	1.34259e-05	-5.702	0.00123075	Intergenic
2R_10726604_SNP	C	A	A	0.09091	18	180	-11.29	9.61392e-08	-5.601	0.00974558	-8.446	1.37553e-05	-5.69	0.0012658	Intergenic
2R_13617484_SNP	A	C	C	0.1684	33	163	-6.26	0.000146067	-7.828	1.82591e-06	-7.044	2.4161e-06	1.568	0.255238	FBgn0034266	CG4975	INTRON	FBgn0034267	CG4984	INTRON
2R_14489842_SNP	C	T	T	0.05612	11	185	-11.14	3.74559e-05	-10.66	7.38888e-05	-10.9	7.56645e-06	-0.4812	0.830237	FBgn0050115	GEFmeso	INTRON
2R_14496838_SNP	G	A	A	0.08081	16	182	-9.348	2.89991e-05	-9.384	3.18641e-05	-9.366	4.5874e-06	0.0357	0.984891	FBgn0050115	GEFmeso	INTRON
2R_15282063_SNP	G	A	A	0.4084	78	113	-4.82	0.000551753	-6.074	1.56193e-06	-5.447	2.25777e-06	1.254	0.237979	FBgn0261439	SdhA	INTRON
2R_15282087_SNP	T	G	G	0.4041	78	115	-4.757	0.000681621	-6.039	1.65422e-06	-5.398	2.58087e-06	1.281	0.226221	FBgn0261439	SdhA	INTRON
2R_15282090_SNP	T	G	G	0.4	76	114	-4.803	0.000741829	-5.923	3.35974e-06	-5.363	3.79205e-06	1.12	0.294818	FBgn0261439	SdhA	INTRON
2R_15282096_SNP	C	A	A	0.3438	66	126	-5.102	0.000529737	-5.613	1.90931e-05	-5.358	6.9849e-06	0.5118	0.641327	FBgn0261439	SdhA	INTRON
2R_15909802_SNP	G	A	A	0.4375	84	108	-5.687	9.99304e-06	-3.583	0.00489651	-4.635	5.30771e-05	-2.105	0.0444023	Intergenic
2R_4404851_SNP	A	G	G	0.05641	11	184	-13.73	3.26859e-07	-5.753	0.0349837	-9.739	6.95328e-05	-7.973	0.000307176	FBgn0050361	mtt	INTRON
2R_6542621_SNP	A	T	T	0.3514	65	120	-6.103	1.64666e-06	-6.105	4.14465e-06	-6.104	3.6377e-07	0.002314	0.998348	Intergenic
2R_6542624_SNP	C	A	A	0.3607	66	117	-5.843	3.38605e-06	-5.656	2.12773e-05	-5.749	1.79166e-06	-0.1861	0.867211	Intergenic
2R_7055512_SNP	C	G	G	0.1077	21	174	-9.394	6.15777e-07	-7.588	0.000155064	-8.491	2.65916e-06	-1.806	0.279107	FBgn0033579	CG13229	INTRON	FBgn0003396	shn	INTRON
3L_10934131_SNP	T	C	T	0.3684	70	120	-3.8	0.00723164	-5.781	8.29959e-06	-4.79	5.32858e-05	1.982	0.0672893	Intergenic
3L_11182554_SNP	A	G	G	0.3711	72	122	-4.208	0.000381658	-5.731	7.75688e-06	-4.969	2.13053e-05	1.523	0.155468	FBgn0036144	GlcAT-P	INTRON
3L_11183248_SNP	A	C	A	0.4684	89	101	-6.01	8.36791e-07	-5.217	3.36055e-05	-5.614	7.52793e-07	-0.7922	0.45088	FBgn0036144	GlcAT-P	INTRON
3L_11815379_SNP	A	G	G	0.05076	10	187	-11.86	9.79897e-06	-8.913	0.00165911	-10.39	4.89911e-05	-2.947	0.208387	FBgn0036212	CG11597	4 bp UPSTREAM	FBgn0036211	CG5946	4 bp UPSTREAM	FBgn0036213	RpL10Ab	572 bp UPSTREAM	FBgn0083015	snoRNA:Psi18S-920	705 bp UPSTREAM
3L_12069715_SNP	T	C	C	0.2234	44	153	-5.731	0.000196797	-6.233	2.51316e-05	-5.982	8.38181e-06	0.5014	0.685189	FBgn0250876	Sema-5c	INTRON
3L_12349672_SNP	G	C	G	0.08763	17	177	-10.59	7.95316e-07	-8.059	0.000261519	-9.325	2.71511e-06	-2.532	0.166989	Intergenic
3L_13100075_SNP	T	C	C	0.2359	46	149	-6.213	3.26302e-05	-5.874	5.82564e-05	-6.043	4.86081e-06	-0.3385	0.781404	Intergenic
3L_13116725_SNP	C	A	C	0.492	92	95	-1.671	0.132673	-5.828	3.6814e-06	-3.749	0.00124548	4.157	6.11691e-05	Intergenic
3L_14861915_SNP	A	G	G	0.1458	28	164	-8.247	7.0025e-06	-6.048	0.000686677	-7.148	8.45231e-06	-2.198	0.136094	FBgn0036454	CG17839	INTRON
3L_14862063_SNP	G	C	C	0.1579	30	160	-7.991	5.34902e-06	-5.22	0.00268553	-6.605	2.4494e-05	-2.772	0.0529535	FBgn0036454	CG17839	INTRON
3L_2130300_SNP	A	G	G	0.1	20	180	-8.499	7.73767e-06	-5.86	0.00449153	-7.18	0.000114602	-2.639	0.120499	FBgn0052311	zormin	INTRON
3L_2438476_DEL	T	TTT	TTT	0.1623	31	160	-7.635	7.05674e-06	-6.359	0.000191448	-6.997	5.43301e-06	-1.276	0.368277	FBgn0261551	CG42669	INTRON
3L_2438492_SNP	T	C	C	0.125	25	175	-9.849	5.25002e-08	-7.146	0.000117386	-8.497	3.36277e-07	-2.703	0.0793284	FBgn0261551	CG42669	INTRON
3L_2615951_SNP	A	G	G	0.1667	32	160	-5.497	0.00138489	1.182	0.489471	-2.157	0.165049	-6.679	8.98487e-07	FBgn0011828	Pxn	INTRON
3L_3396966_SNP	T	C	C	0.07463	15	186	-7.596	0.000969307	-12.78	2.1796e-08	-10.19	1.18861e-06	5.181	0.0070841	Intergenic
3L_3409605_SNP	T	C	C	0.1357	27	172	1.348	0.457757	-5.538	0.00219495	-2.095	0.207344	6.886	2.26728e-06	FBgn0014388	sty	INTRON
3L_3409912_INS	TGG	T	T	0.114	22	171	1.133	0.640967	-6.236	0.00161365	-2.551	0.160378	7.369	3.87479e-06	FBgn0014388	sty	INTRON
3L_9329452_SNP	G	A	A	0.1237	24	170	3.096	0.094502	-4.544	0.0175826	-0.724	0.679716	7.64	5.86502e-07	FBgn0035975	PGRP-LA	INTRON
3L_9438794_SNP	T	C	T	0.0804	16	183	-6.348	0.0126608	-10.46	3.11841e-06	-8.404	4.2881e-05	4.112	0.0282294	FBgn0053926	CG33926	INTRON
3L_9444326_SNP	C	G	C	0.1231	24	171	-6.239	0.00234576	-8.392	8.04218e-06	-7.315	1.97905e-05	2.152	0.171217	FBgn0035996	CG3448	SYNONYMOUS_CODING	FBgn0035995	CG3529	441 bp DOWNSTREAM	FBgn0052038	CG32038	650 bp UPSTREAM
3L_9684400_INS	TT	T	T	0.133	25	163	-6.246	0.000594474	-8.904	1.38517e-06	-7.575	6.94633e-06	2.659	0.0858433	FBgn0036030	CG6767	INTRON
3R_11585902_INS	TT	T	T	0.321	52	110	-3.795	0.024646	-6.807	2.56222e-06	-5.301	6.48776e-05	3.012	0.0126354	Intergenic
3R_14828115_DEL	G	GG	GG	0.1189	22	163	-7.431	0.000210462	-9.143	2.87937e-06	-8.287	3.17717e-06	1.713	0.296443	FBgn0026239	gukh	INTRON
3R_15245242_SNP	T	C	C	0.06122	12	184	-11.83	6.51614e-06	-9.358	0.000304299	-10.59	5.80692e-06	-2.468	0.251375	FBgn0051221	CG31221	INTRON
3R_16554470_SNP	T	C	C	0.05473	11	190	-5.102	0.0506215	-12.24	4.59762e-06	-8.67	0.0004156	7.137	0.0012676	Intergenic
3R_18139211_SNP	A	G	G	0.05051	10	188	-12.91	6.89502e-06	-6.771	0.017439	-9.841	0.000123344	-6.14	0.00832638	FBgn0263117	CG34377	INTRON
3R_19154324_SNP	A	T	T	0.1005	19	170	-10.46	4.94173e-07	-6.421	0.00238079	-8.44	8.79683e-06	-4.037	0.0201788	FBgn0003118	pnt	INTRON
3R_19765317_SNP	T	C	T	0.2919	54	131	-6.105	8.41668e-06	-3.658	0.00985815	-4.882	0.000132768	-2.447	0.0354418	FBgn0001098	Gdh	INTRON
3R_19765388_SNP	A	T	A	0.2703	50	135	-6.456	4.71471e-06	-3.505	0.0158332	-4.981	0.000140084	-2.952	0.0129909	FBgn0001098	Gdh	INTRON
3R_22226964_SNP	G	A	A	0.07107	14	183	-10.84	6.88239e-06	-7.633	0.00161524	-9.238	2.29038e-05	-3.209	0.108402	FBgn0039424	CG14239	667 bp DOWNSTREAM
3R_22283407_SNP	A	C	C	0.05102	10	186	-12.91	5.94977e-06	-6.554	0.0214813	-9.731	0.000148377	-6.354	0.00630497	FBgn0039428	CG14237	443 bp DOWNSTREAM	FBgn0039429	CG14238	564 UPSTREAM
3R_22425893_SNP	A	G	G	0.0625	11	165	-11.72	7.38048e-06	-10.2	0.000161615	-10.96	7.23229e-06	-1.521	0.499146	FBgn0263289	scrib	INTRON
3R_2292991_SNP	T	A	T	0.3898	69	108	-5.299	2.63282e-05	-5.427	4.77339e-05	-5.363	9.32038e-06	0.1283	0.908348	Intergenic
3R_24105092_SNP	C	T	T	0.1237	23	163	-9.183	3.50762e-06	-6.706	0.000545548	-7.945	5.38846e-06	-2.477	0.123068	Intergenic
3R_25273930_DEL	C	CTAC	CTAC	0.09375	18	174	-10.1	1.37989e-06	-6.669	0.00204374	-8.387	1.64109e-05	-3.435	0.0539816	FBgn0004369	Ptp99A	INTRON
3R_25274611_SNP	G	A	A	0.06667	12	168	-12.33	1.86466e-06	-8.659	0.000887996	-10.5	7.60021e-06	-3.673	0.0880118	FBgn0004369	Ptp99A	INTRON
3R_25562001_SNP	A	C	C	0.1341	24	155	-8.011	0.000226065	-7.358	0.000110627	-7.684	8.06095e-06	-0.6525	0.68086	FBgn0027583	CG7601	INTRON	FBgn0039689	CG7598	686 bp UPSTREAM	FBgn0039688	Kul	919 bp DOWNSTREAM
X_11169099_SNP	A	G	G	0.1224	24	172	3.791	0.0735499	-3.118	0.104332	0.3366	0.847722	6.909	6.97535e-06	FBgn0261569	CG42683	INTRON
X_11539174_SNP	A	T	T	0.07937	15	174	-12.23	1.75885e-07	-4.944	0.0366014	-8.59	5.13001e-05	-7.29	0.00013682	FBgn0004370	Ptp10D	INTRON
X_12245955_DEL	G	GG	GG	0.2048	34	132	-2.735	0.109956	-7.814	2.30099e-06	-5.275	0.000539007	5.078	0.000204172	Intergenic
X_15849373_SNP	A	C	C	0.05978	11	173	-12.72	7.36068e-06	-8.105	0.00286433	-10.41	2.07202e-05	-4.612	0.0392237	FBgn0259110	mmd	INTRON
X_17201553_INS	TTGTAT	T	T	0.1598	31	163	-7.765	8.06923e-06	-3.879	0.0242123	-5.822	0.000170624	-3.886	0.00562984	Intergenic
X_18041754_INS	CTCA	G	G	0.065	13	187	-11.26	3.69682e-05	-10.24	3.74016e-05	-10.75	1.65586e-06	-1.022	0.622124	Intergenic
X_18041757_SNP	C	T	T	0.065	13	187	-11.26	3.69682e-05	-10.24	3.74016e-05	-10.75	1.65586e-06	-1.022	0.622124	Intergenic
X_18041758_SNP	T	G	G	0.06533	13	186	-11.28	3.52871e-05	-10.24	3.70466e-05	-10.76	1.60287e-06	-1.039	0.616285	Intergenic
X_18483463_SNP	C	T	T	0.06154	12	183	-11.05	0.00012076	-9.871	0.000135756	-10.46	7.7197e-06	-1.178	0.584572	Intergenic
X_18664560_SNP	C	G	G	0.09453	19	182	-8.556	0.000243462	-9.195	9.86026e-06	-8.875	2.56052e-06	0.6384	0.714206	FBgn0030954	CCKLR-17D3	INTRON
X_18664629_SNP	A	C	C	0.06701	13	181	-9.657	0.000375826	-10.67	1.70902e-05	-10.16	6.43399e-06	1.009	0.626922	FBgn0030954	CCKLR-17D3	INTRON
X_18664931_SNP	C	T	T	0.08543	17	182	-8.746	0.000507442	-8.937	4.71108e-05	-8.842	8.95109e-06	0.191	0.917036	FBgn0030954	CCKLR-17D3	INTRON
X_18665036_SNP	A	T	T	0.09	18	182	-8.333	0.000674452	-9.084	2.10343e-05	-8.709	7.04716e-06	0.7509	0.674238	FBgn0030954	CCKLR-17D3	INTRON
X_18665095_SNP	T	C	C	0.08081	16	182	-9.325	0.00023452	-9.771	1.42964e-05	-9.548	2.91515e-06	0.4457	0.813142	FBgn0030954	CCKLR-17D3	INTRON
X_18665097_SNP	T	G	G	0.08205	16	179	-10.3	4.06048e-05	-11.04	8.10887e-07	-10.67	1.43674e-07	0.7376	0.695822	FBgn0030954	CCKLR-17D3	INTRON
X_18775411_SNP	C	T	T	0.1487	29	166	-8.372	3.37319e-06	-4.775	0.00675447	-6.574	3.35683e-05	-3.598	0.0127521	FBgn0085430	CG34401	742 bp DOWNSTREAM
X_18880559_DEL	G	GG	GG	0.07527	14	172	-11.82	7.86334e-06	-6.443	0.00814747	-9.13	3.00889e-05	-5.373	0.00698986	FBgn0264090	CG43759	INTRON
X_19262778_DEL	G	GG	GG	0.05584	11	186	-12.37	2.33685e-05	-9.631	0.000360589	-11	6.1909e-06	-2.739	0.221488	FBgn0031016	kek5	INTRON
X_19452321_SNP	C	T	T	0.1005	20	179	-8.41	6.90018e-05	-7.999	9.14695e-05	-8.205	9.3076e-06	-0.4106	0.80971	FBgn0263514	mir-4966	82 bp UPSTREAM	FBgn0262228	mir-975	465 bp UPSTREAM	FBgn0262341	mir-976	607 bp UPSTREAM	FBgn0262251	mir-977	734 bp UPSTREAM
X_19672591_SNP	A	C	A	0.07812	15	177	-10.15	8.0602e-06	-6.75	0.00411729	-8.451	6.75715e-05	-3.403	0.078994	FBgn0259789	vfl	NON_SYNONYMOUS_CODING
X_19872669_SNP	A	T	T	0.05528	11	188	-10.88	0.000258044	-10.9	4.92812e-05	-10.89	7.62149e-06	0.01975	0.992949	Intergenic
X_19872679_SNP	G	A	A	0.05076	10	187	-11.76	0.000168591	-11.37	5.27468e-05	-11.56	5.52696e-06	-0.395	0.866395	Intergenic
X_19873596_SNP	A	G	G	0.1667	33	165	-3.007	0.036492	3.493	0.0371686	0.2432	0.874047	-6.5	1.22224e-06	Intergenic
X_19873742_DEL	C	CTA	CTA	0.1878	37	160	-1.802	0.163408	4.377	0.00614577	1.287	0.379845	-6.179	1.44259e-06	Intergenic
X_19874250_DEL	T	TGGGAGATTTT	TGGGAGATTTT	0.1117	21	167	-2.481	0.169124	5.728	0.00469986	1.624	0.382868	-8.209	4.21675e-07	Intergenic
X_19874695_SNP	G	A	A	0.201	39	155	-0.8988	0.393247	5.336	0.000627843	2.219	0.122523	-6.235	7.03736e-07	Intergenic
X_19874784_SNP	T	G	T	0.2278	41	139	-1.136	0.320713	4.907	0.00156112	1.886	0.186217	-6.043	1.30161e-06	Intergenic
X_20400086_SNP	C	G	G	0.08081	16	182	-9.541	7.63147e-05	-9.676	1.74719e-05	-9.608	2.50266e-06	0.1348	0.943016	Intergenic
X_21428322_INS	A	ATCCAGAA	A	0.4561	78	93	4.493	0.000819892	6.141	3.36042e-06	5.317	1.03419e-05	-1.648	0.136687	Intergenic
X_21837856_INS	ATT	A	A	0.1921	34	143	-6.037	0.000286918	-7.528	4.63321e-06	-6.782	5.82782e-06	1.491	0.279244	Intergenic
X_2269619_SNP	G	A	A	0.1206	24	175	-8.291	1.09471e-05	-7.826	3.24443e-05	-8.058	2.23004e-06	-0.4647	0.767839	FBgn0264598	PsGEF	427 bp DOWNSTREAM
X_2269637_SNP	G	A	A	0.1088	21	172	-8.255	4.94814e-05	-9.476	1.84195e-06	-8.865	9.01722e-07	1.221	0.464836	FBgn0264598	PsGEF	409 bp DOWNSTREAM
X_2732916_SNP	G	A	A	0.085	17	183	-9.809	4.57605e-06	-5.803	0.00901995	-7.806	9.61403e-05	-4.007	0.0279462	FBgn0028369	kirre	INTRON
X_7066389_SNP	C	T	T	0.09045	18	181	-9.818	9.48505e-06	-7.417	0.000569832	-8.617	8.93015e-06	-2.401	0.178204	FBgn0029939	CG9650	INTRON
X_7066430_DEL	A	AA	AA	0.09045	18	181	-10	7.45069e-06	-7.417	0.000569288	-8.708	7.08862e-06	-2.582	0.147481	FBgn0029939	CG9650	INTRON
X_7654225_SNP	T	C	C	0.05556	11	187	-6.274	0.0460172	-12.68	2.00208e-06	-9.475	0.000109854	6.402	0.00394333	Intergenic
X_7654315_SNP	T	A	A	0.06599	13	184	-5.324	0.111858	-11.8	1.70886e-06	-8.562	0.000160034	6.476	0.00158355	Intergenic
X_8312234_INS	AA	A	A	0.09091	17	170	-10.22	1.09725e-05	-12.57	5.60714e-09	-11.39	6.51512e-09	2.351	0.200306	FBgn0261793	Trf2	INTRON
X_8387083_SNP	G	T	T	0.055	11	189	-9.585	0.000758217	-13.61	2.95214e-07	-11.6	1.74674e-06	4.021	0.071885	FBgn0053181	CG33181	INTRON
X_8441181_SNP	T	C	C	0.07538	15	184	-6.432	0.0339335	-11	1.87892e-06	-8.716	3.77434e-05	4.566	0.0178914	FBgn0264975	Nrg	SYNONYMOUS_CODING
X_9942795_SNP	G	T	T	0.1317	22	145	-8.369	2.69954e-05	-8.114	4.19665e-05	-8.241	4.30093e-06	-0.2548	0.877618	FBgn0263132	Cht6	INTRON
